# Supplementary material for: Polyphenolic Composition of Carlina acaulis L. Extract and Cytotoxic Potential against Colorectal Adenocarcinoma and Cervical Cancer Cells
Source: MDPI journal article supplement (doi:10.3390/molecules28166148), 2023-08-20
Supplement: s1 [file s1]

# Polyphenolic composition of *Carlina acaulis* L. extract and cytotoxic potential against colorectal adenocarcinoma and cervical cancer cells

Ireneusz Sowa<sup>1,\*</sup>, Jarosław Mołdoch<sup>2</sup>, Roman Paduch<sup>3</sup>, Maciej Strzemiński<sup>1</sup>, Jacek Szkutnik<sup>4</sup>, Katarzyna Tyszczyk-Rotko<sup>5</sup>, Sławomir Dresler<sup>1</sup>, Dariusz Szczepanek<sup>6</sup>, and Magdalena Wójciak<sup>1,\*</sup>

<sup>1</sup> Department of Analytical Chemistry, Medical University of Lublin, Chodźki 4a, 20-093 Lublin, Poland; [i.sowa@umlub.pl](mailto:i.sowa@umlub.pl) (I.S.); [maciej.strzemski@poczta.onet.pl](mailto:maciej.strzemski@poczta.onet.pl) (M.S.); [dresler.slawomir@gmail.com](mailto:dresler.slawomir@gmail.com) (S.D.); [magdalena.wojciak@umlub.pl](mailto:magdalena.wojciak@umlub.pl) (M.W.);

<sup>2</sup> Department of Biochemistry and Crop Quality, Institute of Soil Science and Plant Cultivation, State Research Institute, 24-100 Puławy, Poland; [jmoldoch@iung.pulawy.pl](mailto:jmoldoch@iung.pulawy.pl) (J.M.)

<sup>3</sup> Department of Virology and Immunology, Institute of Biological Sciences, Faculty of Biology and Biotechnology, Maria Curie-Skłodowska University, 19 Akademicka Street, 20-033 Lublin, Poland, [roman.paduch@mail.umcs.pl](mailto:roman.paduch@mail.umcs.pl) (R.P.)

<sup>4</sup> Independent Unit of Functional Masticatory Disorders, Medical University of Lublin, 20-093 Lublin, Poland; [jacek.szcutnik@umlub.pl](mailto:jacek.szcutnik@umlub.pl)

<sup>5</sup> Institute of Chemical Sciences, Faculty of Chemistry, Maria Curie-Skłodowska University in Lublin, 20-031 Lublin, Poland; [katarzyna.tyszczyk-rotko@mail.umcs.pl](mailto:katarzyna.tyszczyk-rotko@mail.umcs.pl)

<sup>6</sup> Chair and Department of Neurosurgery and Paediatric Neurosurgery, Medical University of Lublin, 20-090 Lublin, Poland, [dariusz.szczepanek@umlub.pl](mailto:dariusz.szczepanek@umlub.pl) (D.S.)

\* Correspondence: [ireneusz.sowa@umlub.pl](mailto:ireneusz.sowa@umlub.pl) (I.S.); [magdalena.wojciak@umlub.pl](mailto:magdalena.wojciak@umlub.pl) (M.W.)

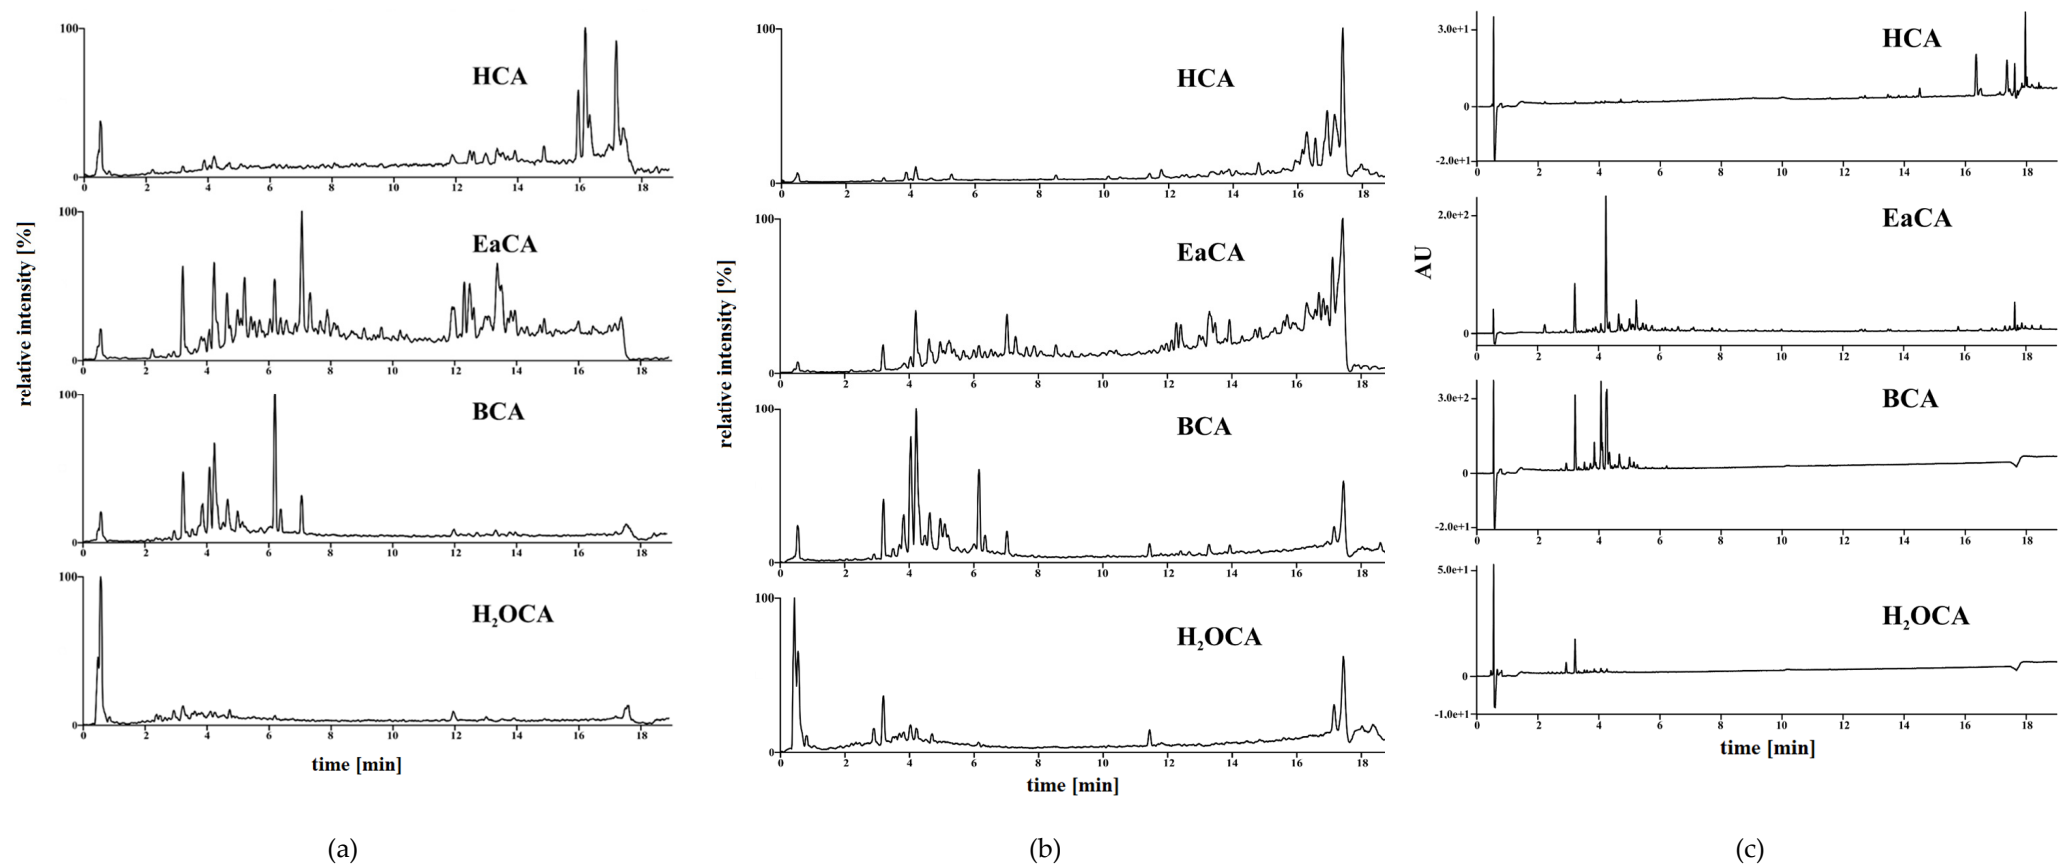

Figure S1. Chromatograms obtained from ultra-performance liquid chromatography with mass spectrometry and electrospray ionization UHPLC-ESI-MS(-) (a) and UHPLC-ESI-MS(+) (b), and UHPLC with photodiode detector—PDA (254 nm) (c). These chromatograms represent fractions obtained through liquid-liquid extraction from the extract of *C. acaulis*. The abbreviations used are as follows: ECV—methanol extract, HCV—hexane fraction, EaCV—acetate fraction, BCV—butanol fraction, H<sub>2</sub>OCV—water fraction.
